# Supplementary material
Source: Springer Nature journal article supplement (https://www.springermedizin.de/resource/supplementary/12879_2013_3065_MOESM2_ESM.pdf/9446896)
Supplement: MOESM2 [file 9446896]

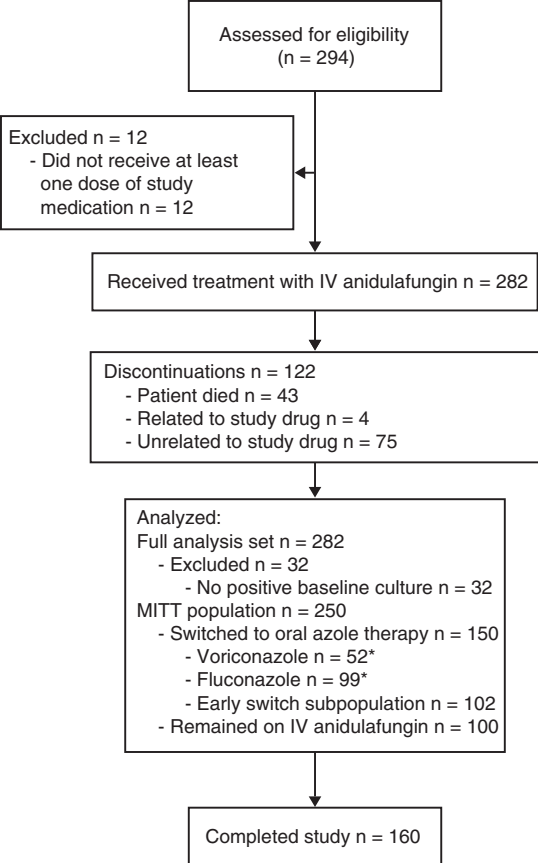

\*Two patients received both oral fluconazole and oral voriconazole.  
Abbreviations used: IV, intravenous; MITT, modified intent-to-treat.
